# Supplementary material for: Pilot-scale demonstration of an electrochemical system for lithium recovery from the desalination concentrate
Source: Royal Society of Chemistry journal article supplement (doi:10.1039/c9ew00756c), 2019-10-03

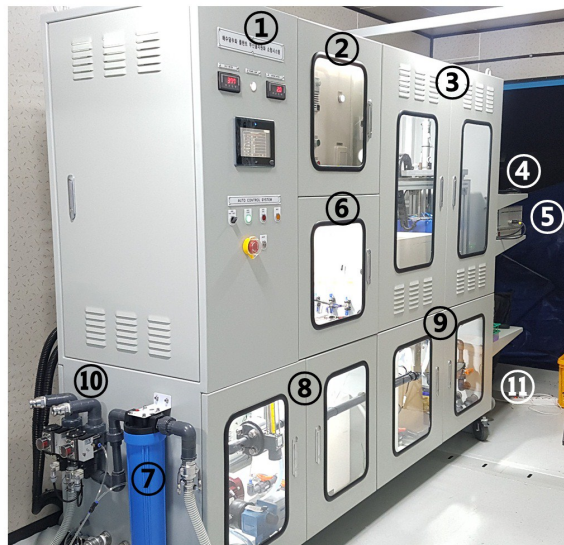

- ① Control panel (pump)
- ② Control panel (primary recovery)
- ③ Primary recovery system
- ④ Computer
- ⑤ Battery cycler
- ⑥ Secondary recovery system
- ⑦ Filter (100  $\mu$ m)
- ⑧ Pumps and tank
- ⑨ Pipe lines of the system
- ⑩ Pipe lines for influents
- ⑪ Pipe lines for effluents

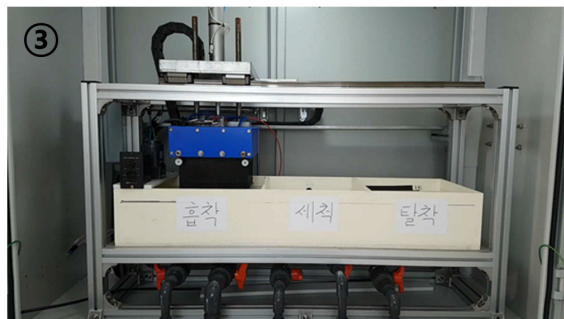

Supplement: c9ew00756c3.pdf [file c9ew00756c3.pdf]
