# Supplementary figures and images for: Pilot-scale demonstration of an electrochemical system for lithium recovery from the desalination concentrate
Source: Royal Society of Chemistry journal article supplement (doi:10.1039/c9ew00756c), 2019-10-03

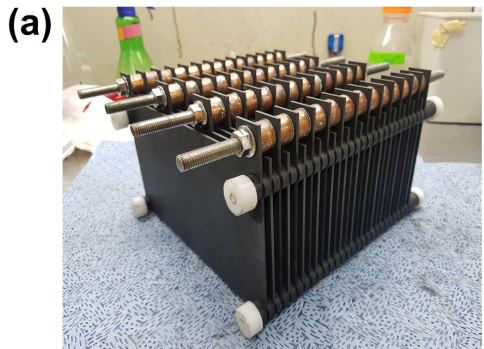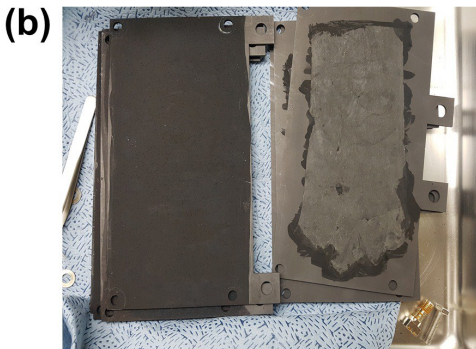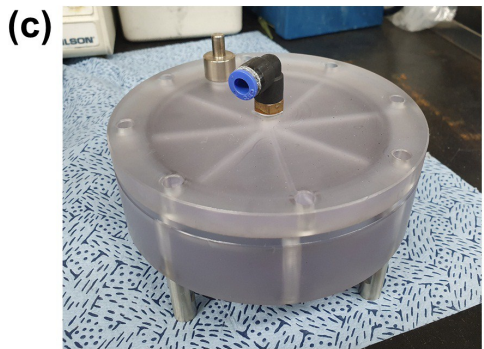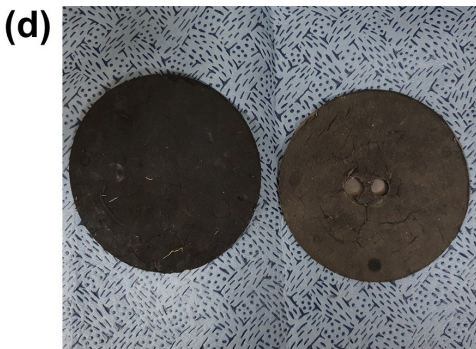

Supplement: c9ew00756c4.pdf [file c9ew00756c4.pdf]

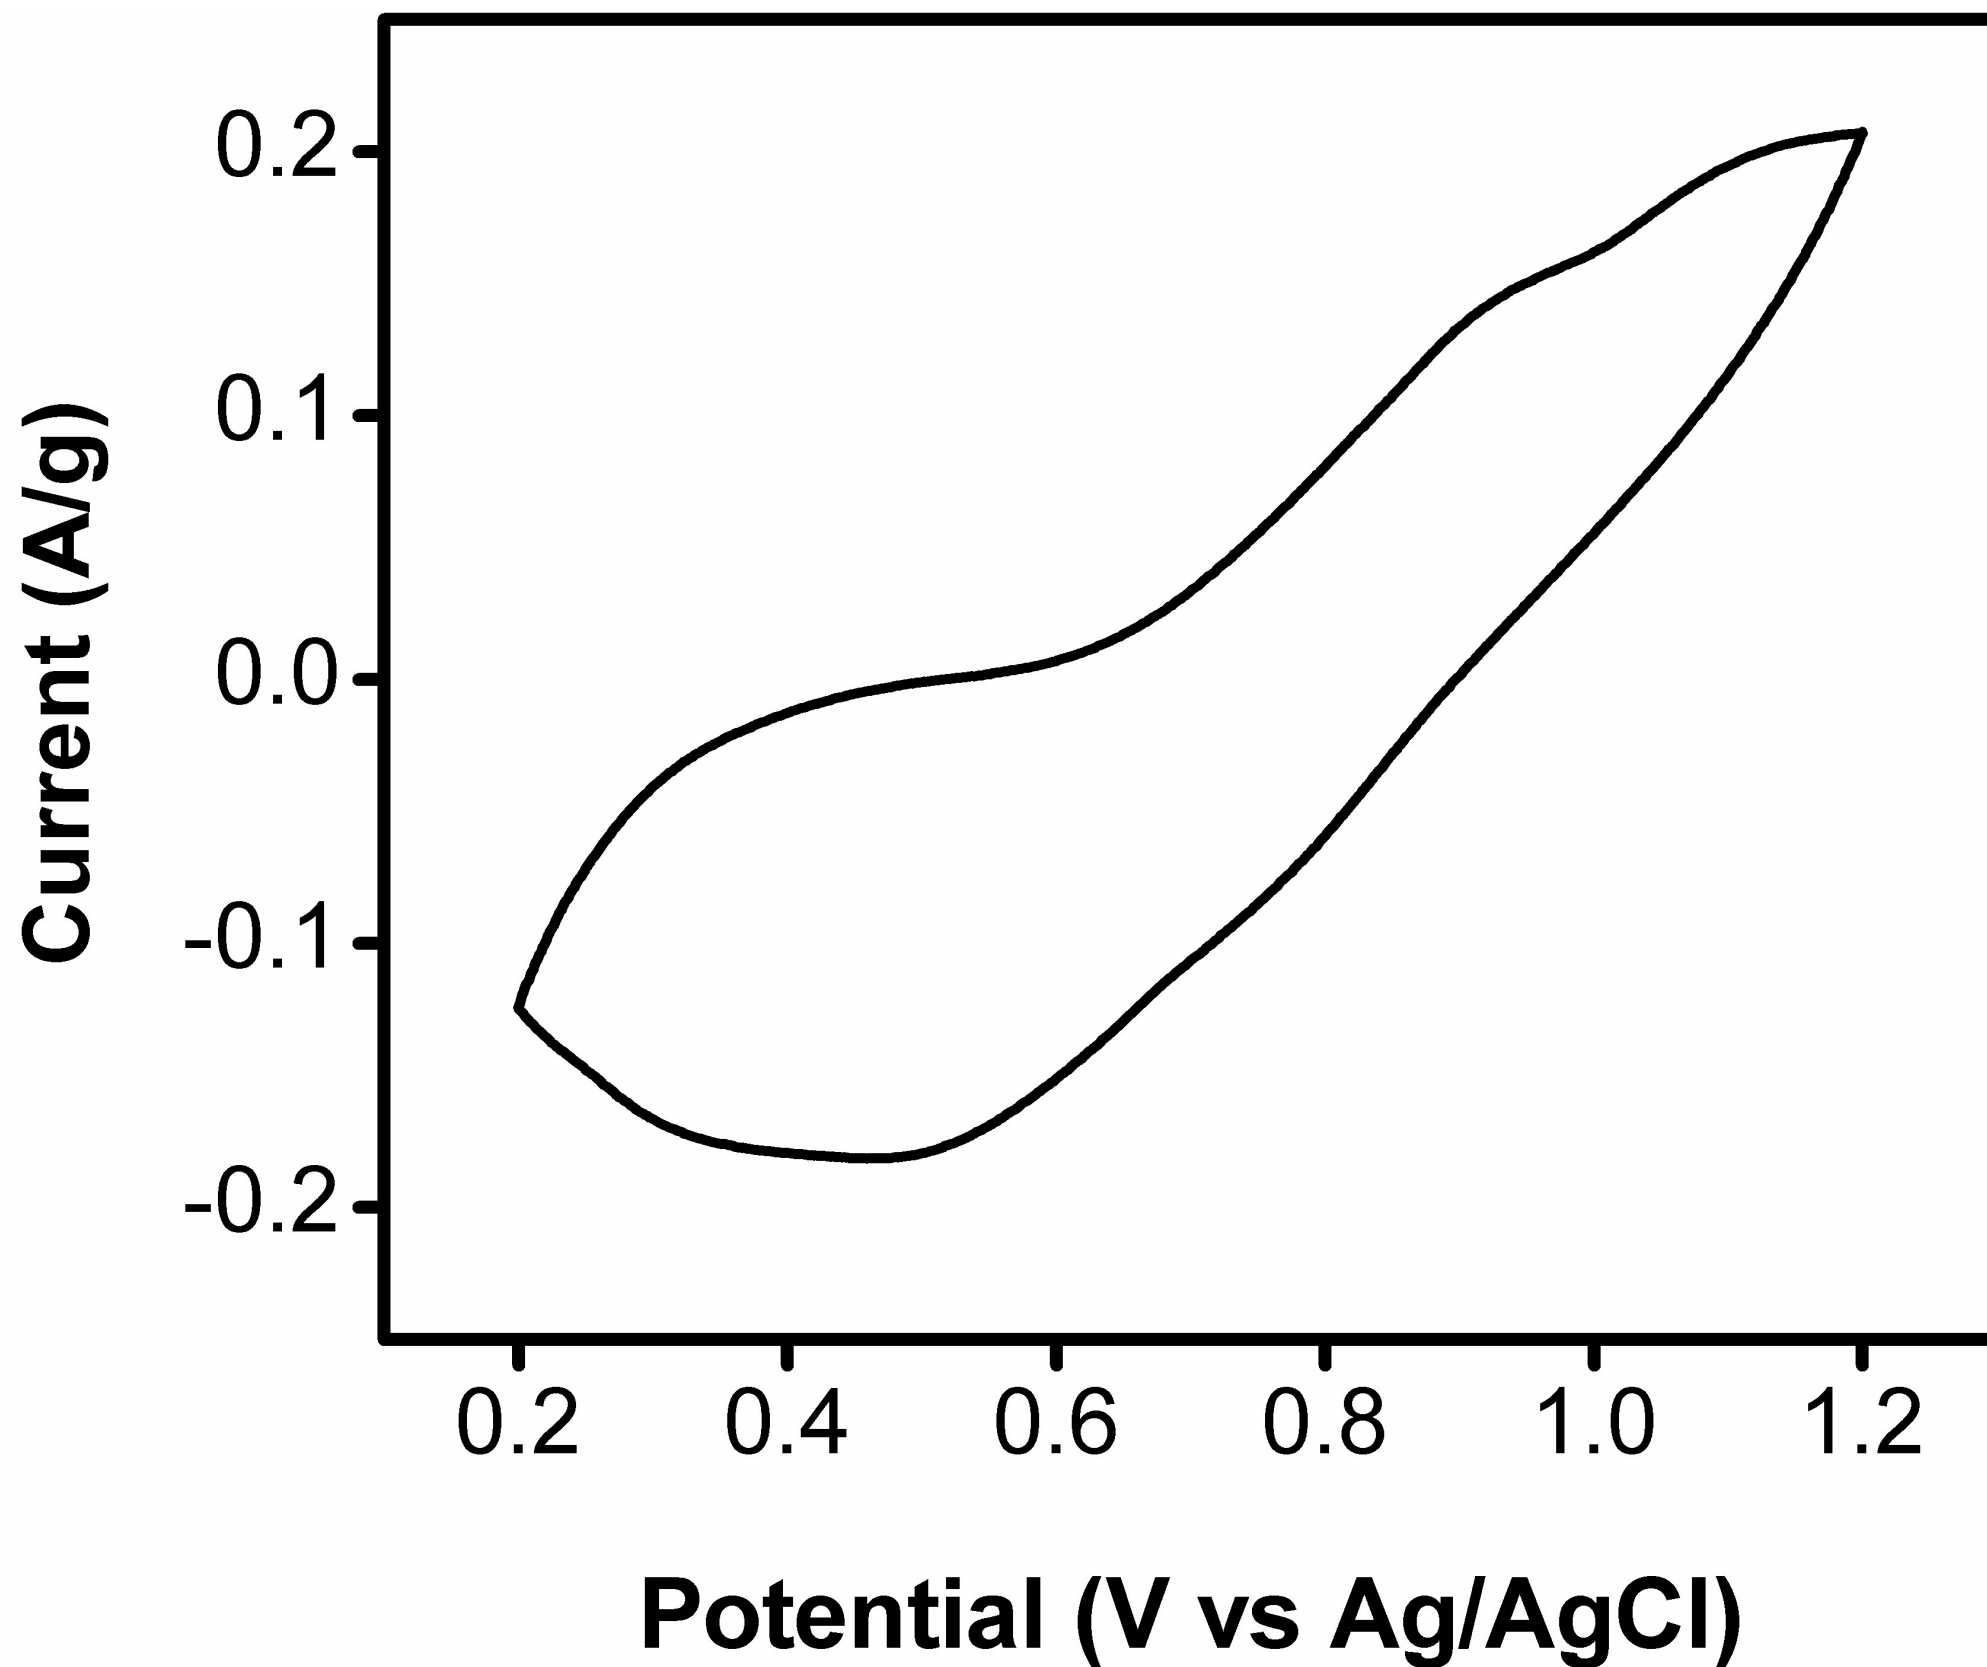

Supplement: c9ew00756c5.pdf [file c9ew00756c5.pdf]
